# Supplementary material for: Morphometric approaches to Cannabis evolution and differentiation from archaeological sites: interpreting the archaeobotanical evidence from bronze age Haimenkou, Yunnan
Source: Springer Nature journal article supplement (doi:10.1007/s00334-023-00966-6), 2023-11-30
Supplement: MOESM2 [file 334_2023_966_MOESM2_ESM.pdf]

EMS1 Table S2.

Measurements of cannabis seeds from Haimenkou, Yunnan. All measurements in mm (from Dal Martello 2020).

| Grain no.      | Site      | Context | Period | Length          | Width           | Thickness       | L/W             |
|----------------|-----------|---------|--------|-----------------|-----------------|-----------------|-----------------|
| 1              | 2008 JHDT | 1204-6  | 2      | 3.55            | 2.83            | 2.22            | 1.254417        |
| 2              | 2008 JHDT | 1204-6  | 2      | 3.88            | 3.33            | 2.8             | 1.165165        |
| 3              | 2008 JHDT | 1204-6  | 2      | 3.31            | 2.76            | 2.27            | 1.199275        |
| 4              | 2008 JHDT | 1204-6  | 2      | 3.17            | 2.58            | 2.33            | 1.228682        |
| 5              | 2008 JHDT | 1204-6  | 2      | 3.81            | 3.02            | 2.49            | 1.261589        |
| 6              | 2008 JHDT | 1204-6  | 2      | 3.49            | 2.57            | 2.25            | 1.357977        |
| 7              | 2008 JHDT | 1204-6  | 2      | 3               | 2.37            | 2.06            | 1.265823        |
| 8              | 2008 JHDT | 1204-6  | 2      | 3.32            | 2.46            | 2.16            | 1.349594        |
| 9              | 2008 JHDT | 1204-6  | 2      | 3.26            | 2.44            | 2.11            | 1.336066        |
| 10             | 2008 JHDT | 1204-6  | 2      | 3.2             | 2.44            | 2.04            | 1.311475        |
| 11             | 2008 JHDT | 1204-6  | 2      | 3.66            | 2.88            | 2.51            | 1.270833        |
| 12             | 2008 JHDT | 1204-6  | 2      | 3.68            | 3.02            | 2.53            | 1.218543        |
| 13             | 2008 JHDT | 1204-6  | 2      | 3.42            | 2.76            | 2.19            | 1.23913         |
| 14             | 2008 JHDT | 1204-6  | 2      | 3.34            | 2.47            | 2.14            | 1.352227        |
| 15             | 2008 JHDT | 1204-6  | 2      | 3.98            | 2.97            | 2.53            | 1.340067        |
| 16             | 2008 JHDT | 1204-6  | 2      | 2.87            | 2.19            | 1.7             | 1.310502        |
| 17             | 2008 JHDT | 1204-6  | 2      | 3.33            | 2.35            | 1.99            | 1.417021        |
| 18             | 2008 JHDT | 1204-6  | 2      | 3.23            | 2.34            | 1.92            | 1.380342        |
| 19             | 2008 JHDT | 1204-6  | 2      | 3.74            | 2.86            | 2.4             | 1.307692        |
| 20             | 2008 JHDT | 1204-6  | 2      | 2.99            | 2.4             | 1.98            | 1.245833        |
| 21             | 2008 JHDT | 1204-6  | 2      | 3.25            | 2.55            | 2.27            | 1.27451         |
| 22             | 2008 JHDT | 1204-6  | 2      | 3.36            | 2.63            | 2.07            | 1.277567        |
| 23             | 2008 JHDT | 1204-6  | 2      | 3.36            | 2.51            | 1.96            | 1.338645        |
| 24             | 2008 JHDT | 1204-6  | 2      | 3.42            | 2.51            | 1.76            | 1.36255         |
| 25             | 2008 JHDT | 1204-6  | 2      | 3.55            | 2.87            | 2.23            | 1.236934        |
| 26             | 2008 JHDT | 1204-6  | 2      | 3.33            | 2.73            | 2.45            | 1.21978         |
| 27             | 2008 JHDT | 1204-6  | 2      | 2.59            | 2.04            | 1.68            | 1.269608        |
| 28             | 2008 JHDT | 1204-6  | 2      | 3.14            | 2.54            | 2.15            | 1.23622         |
| 29             | 2008 JHDT | 1204-6  | 2      | 3.33            | 2.57            | 2.12            | 1.29572         |
| 30             | 2008 JHDT | 1204-6  | 2      | 4.17            | 3.3             | 2.8             | 1.263636        |
| <b>AVERAGE</b> |           |         |        | <b>3.391</b>    | <b>2.643</b>    | <b>2.203667</b> | <b>1.286248</b> |
| <b>STDEV</b>   |           |         |        | <b>0.330802</b> | <b>0.300277</b> | <b>0.28024</b>  | <b>0.059246</b> |
