# Supplementary material for: Morphometric approaches to Cannabis evolution and differentiation from archaeological sites: interpreting the archaeobotanical evidence from bronze age Haimenkou, Yunnan
Source: Veg Hist Archaeobot. 2023 Nov 30;33(4):503–18. doi: 10.1007/s00334-023-00966-6 (PMC11127845; doi:10.1007/s00334-023-00966-6)
Supplement: Supplementary file 4 — Supplementary material 4 (XLSX 26 kb) [file 334_2023_966_MOESM4_ESM.xlsx]

## Sheet: modern measurements
ESM 2
ID number	Provenance	Cannabis type according to original publication	average length in mm	corrected average length (-10%)	length stdev	average width in mm	corrected average width (-10%)	width stdev	projected cannabis type	References	First Reference	Second Reference
1	Russia, Orel	fiber	4.5	4.05		3.5	3.15		fiber	Emboden 1974	Emboden, W. A. 1974. Cannabis: a polytypic genus. Economic Botany, 28(3), 304-310.
2	Afghanistan	fiber	5.4	4.86		4	3.6		fiber	Emboden 1974
3	Unknown	fiber	4.3	3.87		2.8	2.52		fiber	measured from published photographs in Small 2015	Small E. 2015. Evolution and classification of Cannabis sativa (marijuana, hemp) in relation to human utilization. Bot Rev 81:189–294.
4	Unknown	fiber	4.061	3.655	0.380	3.354	3.018	0.428	fiber	measured from published photographs in Small 2015: fig 8 A right: fiber cannabis
5	Netherlands	fiber	4.994	4.494	0.389	3.836	3.452	0.177	fiber	Piluzza et al. 2013	Piluzza, G., Delogu, G., Cabras, A., Marceddu, S. and Bullitta, S., 2013. Differentiation between fiber and drug types of hemp (Cannabis sativa L.) from a collection of wild and domesticated accessions. Genetic resources and crop evolution, 60(8), pp.2331-2342
6	Romania	fiber	4.5	4.05		3	2.7		fiber	Small and Cronquist 1976	Small, E. and Cronquist, A., 1976. A practical and natural taxonomy for Cannabis. Taxon, pp.405-435.
7	Korea (cultivar Cheongsam)	fiber	4.84	4.356	0.225	3.54	3.186	0.216	fiber	Moon et al. 2020	Moon, Y.H., Cha, Y.L., Lee, J.E., Kim, K.S., Kwon, D.E. and Kang, Y.K., 2020. Investigation of suitable seed sizes, segregation of ripe seeds, and improved germination rate for the commercial production of hemp sprouts (Cannabis sativa L.). Journal of the Science of Food and Agriculture, 100(7), pp.2819-2827.
8	India, Delhi	psychoactive	4	3.6		2.5	2.25		psychoactive	Emboden 1974
9	Turkey, Izmir	psychoactive	3.8	3.42		3	2.7		psychoactive	Emboden 1974
10	Unknown	psychoactive	3.398	3.058	0.128	2.428	2.185	0.100	psychoactive	measured from published photographs in Small 2015: fig 8 A left: psychoactive cannabis
11	Netherlands	psychoactive	4.025	3.622	0.301	3.1	2.79	0.251	psychoactive	Piluzza et al. 2013
12	India	psychoactive	3.7	3.33		2.8	2.52		psychoactive	Small and Cronquist 1976
13	Afghanistan	wild/feral	2.8	2.52		1.9	1.71		wild/feral	Emboden 1974
14	Kafiristan	wild/feral	3	2.7		2.2	1.98		wild/feral	Emboden 1974
15	Russia, Saratov	wild/feral	4	3.6		2.8	2.52		wild/feral	Emboden 1974
16	Unknown	wild/feral	2.92	2.628		2.03	1.827		wild/feral	measured from published photographs in Small 2015
17	Kashmir	wild/feral	2.243	2.018	0.160	1.504	1.354	0.170	wild/feral	Russo 2007 mentioned in Bestel et al. 2018	Russo E.B. 2007. History of cannabis and its preparations in saga, science, and sobriquet. Chemistry and Biodiversity 4, 1614–1648.	Bestel S, Bao YJ, Zhong H, Chen XC, Liu L. 2018. Wild plant use and multicropping at the early Neolithic Zhuzhai site in the middle Yellow River region, China. The Holocene 28: 195-207.
18	Dzhungar, ex URSS	wild/feral	2.8	2.52		2	1.8		wild/feral	Small and Cronquist 1976	Small, E. and Cronquist, A., 1976. A practical and natural taxonomy for Cannabis. Taxon, pp.405-435.
19	India	wild/feral	2.7	2.43		1.7	1.53		wild/feral	Small and Cronquist 1976
20	Netherlands	unknown	5.105	4.594		3.815	3.433		fiber	Piluzza et al. 2013
21	China	oil	7.130	6.417		4.916	4.424		oil	Russo 2007 mentioned in Bestel et al. 2018
22	Iran	oil	4.249	3.824		3.26	2.934		fiber/oil	Asadi et al. 2019
23	Poland (Fedora type)	oil	4.78	4.302	0.36	3.12	2.808	0.27	oil	Kaliniewicz et al. 2021	Kaliniewicz, Z., Jadwisienczak, K., Żuk, Z. and Lipinski, A., 2021. Selected physical and mechanical properties of hemp seeds. BioResources, 16(1), p.1411.
24	Poland (unknown type)	unknown	6.09	5.481	0.441	4.55	4.095	0.333	oil?	Kaliniewicz et al. 2021
25	Morocco (Santhica 27)	oil	5.555	4.999		3.388	3.049		oil	Bouayoun et al. 2018	Bouayoun, T., Stambouli, H., El Bouri, A., Farah, A. and Tabyaoui, M., 2018. Hemp seed oil: Chemical characterization of three non-drug varieties cultivated in Morocco. Journal of Applied Biology and Biotechnology, 6(5), pp.3-1.
26	Morocco (Futura 75)	oil	5.22	4.698		3.695	3.325		oil	Bouayoun et al. 2018
27	Morocco (Epsilon 68)	oil	5.464	4.918		3.442	3.098		oil	Bouayoun et al. 2018
28	Iran	oil?	4.95	4.455		3.93	3.537		oil	Taheri-Garavand et al. 2012	Taheri-Garavand, A., Nassiri, A. and Gharibzahedi, S.M.T., 2012. Physical and mechanical properties of hemp seed. International Agrophysics, 26(2).
29	Bangladesh (Rajshahi), Clarke 1877 (BM) (indica dom. type)	psychoactive	4.2	3.78		3.22	2.898		psychoactive	McPartland and Small 2020	McPartland, J.M. and Small, E., 2020. A classification of endangered high-THC cannabis (Cannabis sativa subsp. indica) domesticates and their wild relatives. PhytoKeys, 144, 81-112.
30	India (Combaitore), Bircher 1989 (K) (indica dom. type)	psychoactive	3.81	3.429		2.73	2.457		psychoactive	McPartland and Small 2020
31	South Africa, Hillig 1996 (IND) (indica dom. type)	psychoactive	4	3.6		2.981	2.682		psychoactive	McPartland and Small 2020
32	India, Himachal Pradesh (himalayensis wild type)	mix use (psychoactive/fiber)	3.19	2.871		2.13	1.917		n/a	McPartland and Small 2020
33	India (Bareilly), Roxburgh 1796 (K) (himalayensis wild type)	mix use (psychoactive/fiber)	3.08	2.772		2.18	1.962		n/a	McPartland and Small 2020
34	Bangladesh (East Bengal), Griffith 1835 (GH) (himalayensis wild type)	mix use (psychoactive/fiber)	2.74	2.466		1.77	1.593		n/a	McPartland and Small 2020
35	Afghanistan, Ghazni Province (afghanica dom. type)	mix use (psychoactive/oil)	4.07	3.663		2.79	2.511		n/a	McPartland and Small 2020
36	Afghanistan, Kandahar Province (afghanica dom. type)	mix use (psychoactive/oil)	4.8	4.32		3.76	3.384		n/a	McPartland and Small 2020
37	Xinjiang, China (Yarkant), Henderson 1871 (LE) (afghanica dom. type)	mix use (psychoactive/oil)	5.03	4.527		3.6	3.24		n/a	McPartland and Small 2020
38	Kyrgystan, Issyk-Kul Region (asperrima wild type)	wild/feral	2.92	2.628		2.39	2.151		wild/feral	McPartland and Small 2020
39	Afghanistan (Nuristan), Street 1965 (F) (asperrima wild type)	wild/feral	2.6	2.34		1.8	1.62		wild/feral	McPartland and Small 2020
40	Kazakhstan (Kailiyskiy Alatau), Semenov-Tyan-Shansky 1857 (LE) (asperrima wild type)	wild/feral	3.08	2.772		2.12	1.908		wild/feral	McPartland and Small 2020
41	Kyrgystan, Issyk-Kul Region (asperrima wild type)	wild/feral	2.85	2.565		2.1	1.89		wild/feral	McPartland and Small 2020
42	U.S.A., California (Watson, Hillig 1996, IND) (intentional hybrid strain)	psychoactive	4.26	3.834		3.32	2.988		psychoactive	McPartland and Small 2020
43	Lebanon (CPRO, Hillig 1996, IND) (intermidiate form of indica-afghanica)	psychoactive	4.44	3.996		3.43	3.087		psychoactive	McPartland and Small 2020
44	Lebanon (CPRO, Hillig 1996, IND) (intermidiate form of indica-afghanica)	psychoactive	4.65	4.185		3.33	2.997		psychoactive	McPartland and Small 2020

## Sheet: archaeological measurements
n	Site	Country	Longitude	Latitude	Status of cannabis remains	Start date	End date	Median Age	number of seeds measured	average length in mm	stdev	minimum length	maximum length	corrected average L (-10/5%)*	average width in mm	stdev	minimum width	maximum width	corrected average width (-10/5%)*	average thickness in mm	stdev	minimum thickness	maximum thickness	L/W	Notes	References	First Reference	Second Reference
1	Okinoshima	Japan	34.9907	139.825	charred and directly dated?	-8260	-7990	-8125	3	3.6		3.5	3.8	3.24	3.3		3	3.5	2.97						grains directly dated	Kudo et al. 2009; Kobayashi et al. 2008	Kudo, Y., Kobayashi, M., Momohara, A., Nakamura, T., Okitsu, S., Yanagisawa, S., Okamoto, T., 2009. Radiocarbon dating of the fossil hemp fruits in the earliest Jomon period from the Okinoshima Site, Chiba, Japan. Japanese Journal of Historical Botany 17, 27–32 (in Japanese with English abstract).	Kobayashi, M., Momohara, A., Okitsu, S., Yanagisawa, S. and Okamoto, T., 2008. Fossil hemp fruits in the earliest Jomon period from the Okinoshima site, Chiba Prefecture. Shokuseishi kenkyū, 16(1), pp.11-18.
2	Zhuzhai	China	34.8252	113.305	charred	-5974	-5823	-5898.5	1	3.6					3											Bestel et al. 2018	Bestel S, Bao YJ, Zhong H, Chen XC, Liu L. 2018. Wild plant use and multicropping at the early Neolithic Zhuzhai site in the middle Yellow River region, China. The Holocene 28: 195-207.
3	Torihama	Japan	35.5549	135.901	waterlogged	-4200	-3400	-3800		3.25				2.925	2.85				2.565							Kasahara 1987; Matsui and Kanehara 2006	Kasahara Y. 1987. Torihama Shell Mound, 1985 Survey Summary Report and Research Results: Survey of Low-lying Marsh Ruins Mainly from the Early Jomon Period 6. Wakasa Historical Folk Museum, Fukui Prefecture, pp. 1-6 (in Japanese).	Matsui A, Kanehara M (2006) The question of prehistoric plant husbandry during the Jomon Period in Japan. World Archaeol 38:259–273
4	Yangua	China	35.332	107.584	charred		5000 BP	-3000		5.1					4.3					3.15						Zhou et al. 2011	Zhou X, Li X, Zhao K, Dodson J, Sun N, Yang Q. 2011. Early agricultural development and environmental effects in the Neolithic Longdong basin (eastern Gansu). Chin Sci Bull 56:762–771.
5	Hamin Mangha	China	43.955	122.175	charred		5000 BP	-3000	3	3.3					2.4											Sun 2014	Sun Y. 2014. Research on plant remains from Neolithic to Early Bronze Age in Upper West Liao River region (Xi Liaohe Shangyou Diqu Xinshiqi Shidai Zhi Zaoqi Qintong Shidai Zhiwu Yicun YAnjiu). Ph.D. Thesis, Inner Mongolia Normal University .
6	Jinchankou	China	36.5209	103.052	charred		2670 BC	-2670	1	3.12					2.556										est. photo	Yang 2014	Yang Y. 2014. The analysis of charred plant seeds at Jinchankou site and Lijiaping site during Qijia Culture period in the Hehuang region, China. Master thesis, Lanzhou: Lanzhou University.
7	Buziping	China	35.4591	104.467	charred	-2940	-1930	-2435	1	3.72					2.8										est. photo	Jia et al. 2012	Jia X, Dong G, Li H et al. 2012. The development of agriculture and its impact on cultural expansion during the late Neolithic in the Western Loess Plateau, China. Holocene 23:85–92
8	Kunal	India	29.3741	75.3944	charred	-2600	-1500	-2050		5					3					2.25						Saraswat and Pokharia 20023	Saraswat KS, Pokharia AK. 2003. Palaeoethnobotanical investigations at Early Harappan Kunal. Pragdhara 13:105–139
9	Hetapatti	India	25.4833	81.9253	charred	-2500	-1500	-2000	1	3.54					3.07										est. photo	Pokharia et al. 2017	Pokharia AK, Sharma S, Tripathi D, Mishra N, Pal JN,Vinay R, Srivastava A. 2017.Neolithic—early historic (2500-200 BC) plant use: the archaeobotany of Ganga Plain, India. Quaternary International 443: 223-237.
10	Erdaojingzi	China	42.1718	119.078	charred	-2000	-1500	-1750	3	3.26					2.32											Sun 2014
11	Shimoyakebe	Japan	35.4558	139.27	charred	3400 BP		-1400		3.2		3.1	3.3		2.15		2	2.3							est. photo	Sasaki, Kudo and Momahara 2007; Crawford 2011	Sasaki, Y., Y. Kudo, and A. Momohara. 2007. Utilization of plant resources reconstructed from plant macrofossils during the latter half of the Jomon period at the Shimo-yakebe site, Tokyo. Japanese Journal of Historical Botany 15:35–50.	Crawford G.W. 2011. Advances in understanding early agriculture in Japan. Curr Anthropol 52(S4):S331–S345
12	Gaocheng Taixi	China	38.0047	114.511	charred	-1600	-1046	-1323		4.5					4											Chen 2007	Chen X. 2007. Paleoethnobotany and agriculture across the transition from the Late Neolithic to the Bronze Age in Northeastern China: A case study. Ph.D. Thesis, Shandong University. (in Chinese)
13	Daxingzhuang	China	36.7113	117.106	charred	-1435	-1050	-1242.5	4	3.168	0.345	2.61	3.7		2.432	0.271	2182	3.2							est. graphs and photos	Chen 2007
14	Senuwar	India	24.9317	83.9367	charred	-1400	-700	-1050	2	2.45					2					1.5						Saraswat 2004	Saraswat, K.S. (2004) “Plant economy of early farming communities at Senuwar, Bihar,” in B. P. Singh (ed.) Senuwar Excavations. Banares Hindu University, Varanasi.
15	Haimenkou	China	26.4333	99.9167	charred	-1600	-400	-1000	30	3.391	0.33	2.59	4.17		2.643	0.3	2.04	3.33		2.203	0.28	1.68	2.8			this study; Dal Martello 2020	Dal Martello R., Min R., Stevens C.J., Qin L., Fuller D. Q. The agricultural and cultural significance of Cannabis sative in Bronze Age Yunnan: archaeobotanical evidence from Haimenkou. Economic Botany	Dal Martello, R. 2020. Agricultural trajectories in Yunnan, Southwest China: a comparative analysis of archaeobotanical remains from the Neolithic to the Bronze Age. PhD dissertation, London: University College London.
16	Guanzhuang	China	34.8519	113.374	charred	-800	-400	-600	1	3.2					2.3											Tang et al. 2022	Tang, L., Zheng, Y., Zhu, J., Tian, J., Gao, X. and Han, G., 2022. Study on the utilization of crops in Zhou Dynasty in the Zhengzhou region: A case from Guanzhuang site, Xingyang. Quaternary Sciences, (1), pp.129-143.
17	Jiayi	China	42.5418	89.1155	dessicated	-800	-400	-600	2	3.792				3.413	2.725				2.452						est. photo	Jiang et al. 2016	Jiang, H., Wang, L., Merlin, M.D., Clarke, R.C., Pan, Y., Zhang, Y., Xiao, G. and Ding, X., 2016. Ancient Cannabis burial shroud in a central Eurasian cemetery. Economic Botany, 70(3), 213-221.
18	Yanghai	China	42.7875	89.6569	dessicated	-820	-300	-560	50	2.99	0.311	2.2	3.6	2.691	2.19	0.177	1.7	2.5	1.971					1.365	est. photo	Jiang et al. 2006	Jiang H-E, Li X, Zhao Y-X et al. 2006. A new insight into Cannabis sativa (Cannabaceae) utilization from 2500-year-old Yanghai Tombs, Xinjiang, China. J Ethnopharmacol 108:414–422
19	Shinchangdong	Korea	35.1123	126.505	waterlogged	-200	-100	-150	8	4.25		3.5	5	3.825	3.45		3	3.9	3.105	3.15		2.8	3.5			Lee 2003	Lee G.A. 2003. Changes in subsistence systems in Sothern Korea from the Chulmun to Mumun Periods: Archaeobotanical Investigation. PhD thesis. University of Toronto.
20	Laoguanshan M2	China	30.45	104.7	partially charred	-157	-141	-149	20	4.16	0.054	3.72	4.61		3.31	0.044	2.95	3.66		2.81	0.042	2.45	3.05			Bei et al. 2021	Bai, Y., Jiang, M., Xie, T., Jiang, C., Gu, M., Zhou, X., Yan, X., Yuan, Y. and Huang, L., 2021. Archaeobotanical evidence of the use of medicinal cannabis in a secular context unearthed from south China. Journal of Ethnopharmacology, 275, p.114114
21	Laoguanshan M3	China			partially charred			-149	20	3.46	0.041	3.15	3.74		2.77	0.042	2.42	3.1		1.9	0.066	1.39	2.44			Bei et al. 2021
22	Haihun Marquis Graveyard	China	29.03	115.94	waterlogged			-59	6	3.275	0.299	2.916	3.757	2.948	2.668	0.32	2.215	3.168	2.401						est. photo	Jiang et al. 2021	Jiang, H., Yang, J., Liang, T., Zhang, Z., Wang, S., Qi, X., & Sheng, P. (2021). Palaeoethnobotanical analysis of plant remains discovered in the graveyard of the Haihun Marquis, Nanchang, China. Vegetation History and Archaeobotany, 30(1), 119-135.
23	Qara Qorum	Mongolia	47.195	102.788	charred	450	750	550	1	2.9					2										est. photo	Rosch et al. 2005	Rösch, M., Fischer, E. and Märkle, T., 2005. Human diet and land use in the time of the Khans—Archaeobotanical research in the capital of the Mongolian Empire, Qara Qorum, Mongolia. Vegetation history and archaeobotany, 14(4), pp.485-492.Rull, V. 2022. Origin, early expansion, domestication and anthropogenic diffusion of Cannabis, with emphasis on Europe and the Iberian Peninsula. Perspectives in…
24	Karakhoja	China	42.4843	89.3129	dessicated	265	907	586				3.38	4.61				2.47	3.96								Chen et al. 2019	Chen, T, J.J. He, S.W. Yao, Z.W. Qiu, H.J. Mai, B. Wang and H.G. Jiang 2019. Chemical analysis of painted horsetail ornaments unearthed at the ancient cemetery of Astana, in Xinjiang (Xinjiang Astana Gumuqun Chutu Caisu Mawei Jiangshiwu de Kexue Fenxi_. Quanternary Studies 39(1), pp.258-263.
25	Astana, Xinjiang	China	42.5236	89.3148	dessicated			658	18	4.23	0.44	3.27	4.96	3.807	3.3	0.32	2.61	3.76	2.97							Chen et al. 2012	Chen, T., Wu, Y., Zhang, Y., Wang, B., Hu, Y., Wang, C. and Jiang, H., 2012. Archaeobotanical study of ancient food and cereal remains at the Astana Cemeteries, Xinjiang, China. PLOS ONE 7(9): e45137
					* dessicated/waterlogged remains are corrected by -10%; partially charred remains are corrected by -5%
